# Supplementary material
Source: publisher site journal article supplement (https://www.dovepress.com/article/460547)
Supplement: Supplementary file 1 [file get_supplementary_file.php]

| Table A.1 Perceived challenges to teleradiology according to experience (years after residency) and workplace (MOH: Ministry of Health; non-MOH govt: governmental hospitals that are not part of MOH; Private: private hospitals and polyclinics) | | | | | | | | | |
| --- | --- | --- | --- | --- | --- | --- | --- | --- | --- |
| Challenge | Response* | Years after residency | | | p-value | Workplace | | | p-value |
| 10 to 25 | 26 or more | Under 10 | MOH | Non-MOH govt | Private |
| Lack of proximity to the technologist | NCAL | 5(13%) | 0(0%) | 9(15%) | 0.095 | 6(11.1%) | 6(13.6%) | 2(28.6%) | .554 |
| NC | 10(26%) | 3(50%) | 13(21%) | 16(29.6%) | 9(20.5%) | 1(14.3%) |
| N | 4(11%) | 1(17%) | 23(38%) | 15(27.8%) | 12(27.3%) | 1(14.3%) |
| SC | 9(24%) | 1(17%) | 9(15%) | 11(20.4%) | 6(13.6%) | 2(28.6%) |
| EC | 10(26%) | 1(17%) | 7(11%) | 6(11.1%) | 11(25.0%) | 1(14.3%) |
|  | |  | | | |  | | | |
| Lack of proximity to the referring physician | NCAL | 2(5%) | 1(17%) | 5(8%) | 0.214 | 5(9.3%) | 3(6.8%) | 0(0.0%) | .045 |
| NC | 7(18%) | 0(0%) | 13(21%) | 12(22.2%) | 8(18.2%) | 0(0.0%) |
| N | 11(29%) | 5(83%) | 21(34%) | 18(33.3%) | 14(31.8%) | 5(71.4%) |
| SC | 10(26%) | 0(0%) | 9(15%) | 14(25.9%) | 5(11.4%) | 0(0.0%) |
| EC | 8(21%) | 0(0%) | 13(21%) | 5(9.3%) | 14(31.8%) | 2(28.6%) |
|  | |  | | | |  | | | |
| Lack of proximity to other radiologists | NCAL | 13(34%) | 0(0%) | 18(30%) | 0.766 | 16(29.6%) | 12(27.3%) | 3(42.9%) | .021 |
| NC | 8(21%) | 3(50%) | 14(23%) | 16(29.6%) | 6(13.6%) | 3(42.9%) |
| N | 9(24%) | 1(17%) | 17(28%) | 17(31.5%) | 9(20.5%) | 1(14.3%) |
| SC | 3(8%) | 1(17%) | 5(8%) | 3(5.6%) | 6(13.6%) | 0(0.0%) |
| EC | 5(13%) | 1(17%) | 7(11%) | 2(3.7%) | 11(25.0%) | 0(0.0%) |
|  | |  | | | |  | | | |
| Accessing prior imaging exams | NCAL | 6(16%) | 2(33%) | 7(11%) | 0.157 | 4(7.4%) | 11(25.0%) | 0(0.0%) | .298 |
| NC | 2(5%) | 1(17%) | 4(7%) | 4(7.4%) | 3(6.8%) | 0(0.0%) |
| N | 2(5%) | 1(17%) | 17(28%) | 12(22.2%) | 7(15.9%) | 1(14.3%) |
| SC | 14(37%) | 1(17%) | 14(23%) | 17(31.5%) | 10(22.7%) | 2(28.6%) |
| EC | 14(37%) | 1(17%) | 19(31%) | 17(31.5%) | 13(29.5%) | 4(57.1%) |
|  | |  | | |  |  | | | |
| Accessing the patient’s record in the Electronic Health Record (EHR) | NCAL | 3(8%) | 1(17%) | 1(2%) | 0.08 | 3(5.6%) | 1(2.3%) | 1(14.3%) | .390 |
| NC | 2(5%) | 1(17%) | 4(7%) | 2(3.7%) | 4(9.1%) | 1(14.3%) |
| N | 3(8%) | 1(17%) | 17(28%) | 11(20.4%) | 10(22.7%) | 0(0.0%) |
| SC | 16(42%) | 0(0%) | 15(25%) | 20(37.0%) | 9(20.5%) | 2(28.6%) |
| EC | 14(37%) | 3(50%) | 24(39%) | 18(33.3%) | 20(45.5%) | 3(42.9%) |
|  | |  | | | |  | | | |
| Achieving credentialing for interpreting off-site exams | NCAL | 9(24%) | 2(33%) | 8(13%) | 0.702 | 9(16.7%) | 9(20.5%) | 1(14.3%) | .800 |
| NC | 3(8%) | 0(0%) | 9(15%) | 6(11.1%) | 6(13.6%) | 0(0.0%) |
| N | 16(42%) | 3(50%) | 29(48%) | 28(51.9%) | 16(36.4%) | 4(57.1%) |
| SC | 5(13%) | 1(17%) | 10(16%) | 8(14.8%) | 7(15.9%) | 1(14.3%) |
| EC | 5(13%) | 0(0%) | 5(8%) | 3(5.6%) | 6(13.6%) | 1(14.3%) |
|  | |  | | | |  | | | |
| Receiving reimbursement for interpreting off-site exams | NCAL | 7(18%) | 0(0%) | 8(13%) | 0.361 | 6(11.1%) | 9(20.5%) | 0(0.0%) | .455 |
| NC | 7(18%) | 3(50%) | 14(23%) | 14(25.9%) | 9(20.5%) | 1(14.3%) |
| N | 10(26%) | 2(33%) | 25(41%) | 20(37.0%) | 13(29.5%) | 4(57.1%) |
| SC | 10(26%) | 0(0%) | 8(13%) | 11(20.4%) | 6(13.6%) | 1(14.3%) |
| EC | 4(11%) | 1(17%) | 6(10%) | 3(5.6%) | 7(15.9%) | 1(14.3%) |
|  | |  | | | |  | | | |
| Performing quality assurance of off-site exams | NCAL | 3(8%) | 0(0%) | 4(7%) | 0.205 | 4(7.4%) | 3(6.8%) | 0(0.0%) | .260 |
| NC | 7(18%) | 3(50%) | 7(11%) | 8(14.8%) | 7(15.9%) | 2(28.6%) |
| N | 7(18%) | 1(17%) | 18(30%) | 11(20.4%) | 15(34.1%) | 0(0.0%) |
| SC | 11(29%) | 2(33%) | 11(18%) | 17(31.5%) | 5(11.4%) | 2(28.6%) |
| EC | 10(26%) | 0(0%) | 21(34%) | 14(25.9%) | 14(31.8%) | 3(42.9%) |
|  | |  | | | |  | | | |
| Maintaining privacy and security of off-site exams | NCAL | 13(34%) | 0(0%) | 25(41%) | 0.095 | 19(35.2%) | 16(36.4%) | 3(42.9%) | .254 |
| NC | 12(32%) | 3(50%) | 10(16%) | 11(20.4%) | 11(25.0%) | 3(42.9%) |
| N | 3(8%) | 1(17%) | 15(25%) | 11(20.4%) | 7(15.9%) | 1(14.3%) |
| SC | 4(11%) | 0(0%) | 5(8%) | 8(14.8%) | 1(2.3%) | 0(0.0%) |
| EC | 6(16%) | 2(33%) | 6(10%) | 5(9.3%) | 9(20.5%) | 0(0.0%) |
|  | |  | | | |  | | | |
| Integrating the off-site exams into a practice’s central PACS | NCAL | 6(16%) | 1(17%) | 12(20%) | 0.763 | 8(14.8%) | 9(20.5%) | 2(28.6%) | .208 |
| NC | 5(13%) | 1(17%) | 12(20%) | 9(16.7%) | 8(18.2%) | 1(14.3%) |
| N | 17(45%) | 2(33%) | 18(30%) | 22(40.7%) | 12(27.3%) | 3(42.9%) |
| SC | 4(11%) | 0(0%) | 10(16%) | 10(18.5%) | 3(6.8%) | 1(14.3%) |
| EC | 6(16%) | 2(33%) | 9(15%) | 5(9.3%) | 12(27.3%) | 0(0.0%) |
| *NCAL: not challenging at all; NC: not challenging; N: neutral; SC: somewhat challenging; EC: extremely challenging | | | | | | | | | |

| Table A.2 Attributes and strategies that would be useful to improve teleradiology according to experience (years after residency) and workplace (MOH: Ministry of Health; non-MOH govt: governmental hospitals that are not part of MOH; Private: private hospitals and polyclinics) | | | | | | | | | |
| --- | --- | --- | --- | --- | --- | --- | --- | --- | --- |
| Strategy | Response* | Years after residency | | | p-value | Workplace | | | p-value |
| 10 to 25 | 26 or more | Under 10 | MOH | non-MOH govt | Private |
| Standardization of licensing and credentialing | NUAA | 2(5.3%) | 0(0.0%) | 3(4.9%) | .683 | 2(3.7%) | 2(4.5%) | 1(14.3%) | .654 |
| NU | 3(7.9%) | 0(0.0%) | 4(6.6%) | 3(5.6%) | 3(6.8%) | 1(14.3%) |
| N | 7(18.4%) | 1(16.7%) | 9(14.8%) | 9(16.7%) | 7(15.9%) | 1(14.3%) |
| SU | 3(7.9%) | 2(33.3%) | 15(24.6%) | 14(25.9%) | 5(11.4%) | 1(14.3%) |
| VU | 23(60.5%) | 3(50.0%) | 30(49.2%) | 26(48.1%) | 27(61.4%) | 3(42.9%) |
|  | |  | | | |  | | | |
| Standardization of regulations across states | NUAA | 2(5.3%) | 0(0.0%) | 2(3.3%) | .930 | 2(3.7%) | 2(4.5%) | 0(0.0%) | .951 |
| NU | 4(10.5%) | 0(0.0%) | 3(4.9%) | 4(7.4%) | 2(4.5%) | 1(14.3%) |
| N | 4(10.5%) | 1(16.7%) | 5(8.2%) | 6(11.1%) | 3(6.8%) | 1(14.3%) |
| SU | 8(21.1%) | 2(33.3%) | 15(24.6%) | 14(25.9%) | 10(22.7%) | 1(14.3%) |
| VU | 20(52.6%) | 3(50.0%) | 36(59.0%) | 28(51.9%) | 27(61.4%) | 4(57.1%) |
|  | |  | | | |  | | | |
| Technical interpretation standards | NUAA | 1(2.6%) | 0(0.0%) | 2(3.3%) | .671 | 1(1.9%) | 2(4.5%) | 0(0.0%) | .472 |
| NU | 3(7.9%) | 0(0.0%) | 5(8.2%) | 3(5.6%) | 4(9.1%) | 1(14.3%) |
| N | 8(21.1%) | 1(16.7%) | 14(23.0%) | 15(27.8%) | 5(11.4%) | 3(42.9%) |
| SU | 4(10.5%) | 2(33.3%) | 16(26.2%) | 12(22.2%) | 9(20.5%) | 1(14.3%) |
| VU | 22(57.9%) | 3(50.0%) | 24(39.3%) | 23(42.6%) | 24(54.5%) | 2(28.6%) |
|  | |  | | | |  | | | |
| Ease of communication with referring physicians | NUAA | 2(5.3%) | 0(0.0%) | 3(4.9%) | .914 | 2(3.7%) | 3(6.8%) | 0(0.0%) | .032 |
| NU | 3(7.9%) | 0(0.0%) | 8(13.1%) | 8(14.8%) | 3(6.8%) | 0(0.0%) |
| N | 6(15.8%) | 1(16.7%) | 6(9.8%) | 5(9.3%) | 5(11.4%) | 3(42.9%) |
| SU | 9(23.7%) | 1(16.7%) | 17(27.9%) | 19(35.2%) | 6(13.6%) | 2(28.6%) |
| VU | 18(47.4%) | 4(66.7%) | 27(44.3%) | 20(37.0%) | 27(61.4%) | 2(28.6%) |
|  | |  | | | |  | | | |
| Ease of communication with technologists | NUAA | 2(5.3%) | 0(0.0%) | 4(6.6%) | .513 | 4(7.4%) | 2(4.5%) | 0(0.0%) | .000 |
| NU | 4(10.5%) | 0(0.0%) | 4(6.6%) | 1(1.9%) | 4(9.1%) | 3(42.9%) |
| N | 3(7.9%) | 2(33.3%) | 6(9.8%) | 9(16.7%) | 2(4.5%) | 0(0.0%) |
| SU | 4(10.5%) | 0(0.0%) | 12(19.7%) | 13(24.1%) | 2(4.5%) | 1(14.3%) |
| VU | 25(65.8%) | 4(66.7%) | 35(57.4%) | 27(50.0%) | 34(77.3%) | 3(42.9%) |
|  | |  | | | |  | | | |
| Rapid communication with referring physicians | NUAA | 2(5.3%) | 0(0.0%) | 3(4.9%) | .974 | 3(5.6%) | 2(4.5%) | 0(0.0%) | .068 |
| NU | 3(7.9%) | 0(0.0%) | 4(6.6%) | 4(7.4%) | 3(6.8%) | 0(0.0%) |
| N | 5(13.2%) | 1(16.7%) | 9(14.8%) | 9(16.7%) | 3(6.8%) | 3(42.9%) |
| SU | 10(26.3%) | 1(16.7%) | 11(18.0%) | 15(27.8%) | 5(11.4%) | 2(28.6%) |
| VU | 18(47.4%) | 4(66.7%) | 34(55.7%) | 23(42.6%) | 31(70.5%) | 2(28.6%) |
|  | |  | | | |  | | | |
| Rapid communication with technologists | NUAA | 3(7.9%) | 0(0.0%) | 3(4.9%) | .767 | 2(3.7%) | 2(4.5%) | 2(28.6%) | .052 |
| NU | 2(5.3%) | 0(0.0%) | 4(6.6%) | 2(3.7%) | 3(6.8%) | 1(14.3%) |
| N | 6(15.8%) | 1(16.7%) | 6(9.8%) | 7(13.0%) | 5(11.4%) | 1(14.3%) |
| SU | 3(7.9%) | 2(33.3%) | 8(13.1%) | 11(20.4%) | 2(4.5%) | 0(0.0%) |
| VU | 24(63.2%) | 3(50.0%) | 40(65.6%) | 32(59.3%) | 32(72.7%) | 3(42.9%) |
| *NUAA: not useful at all; NU: not useful; N: neutral; SU: somewhat useful; VU: very useful | | | | | | | | | |

| Table A.3 Level of agreement with potential benefits of teleradiology according to experience (years after residency) and workplace (MOH: Ministry of Health; non-MOH govt: governmental hospitals that are not part of MOH; Private: private hospitals and polyclinics) | | | | | | | | | |
| --- | --- | --- | --- | --- | --- | --- | --- | --- | --- |
| Statement | Likert Scale* | Years after residency | | | p-value | Workplace | | | p-value |
| 10 to 25 years | 26 or more years | Under 10 years | MOH | non-MOH govt | Private |
| Reading off-site exams helps my practice provide geographic coverage | SA | 13(34.2%) | 3(50.0%) | 30(49.2%) | .075 | 29(53.7%) | 17(38.6%) | 0(0.0%) | .059 |
| A | 13(34.2%) | 0(0.0%) | 24(39.3%) | 17(31.5%) | 17(38.6%) | 3(42.9%) |
| N | 4(10.5%) | 1(16.7%) | 5(8.2%) | 3(5.6%) | 5(11.4%) | 2(28.6%) |
| D | 4(10.5%) | 1(16.7%) | 2(3.3%) | 3(5.6%) | 2(4.5%) | 2(28.6%) |
| SD | 4(10.5%) | 1(16.7%) | 0(0.0%) | 2(3.7%) | 3(6.8%) | 0(0.0%) |
|  | |  | | | |  | | | |
| Reading off-site exams helps my practice provide after- hours coverage | SA | 13(34.2%) | 3(50.0%) | 23(37.7%) | .419 | 21(38.9%) | 17(38.6%) | 1(14.3%) | .629 |
| A | 12(31.6%) | 1(16.7%) | 22(36.1%) | 15(27.8%) | 17(38.6%) | 3(42.9%) |
| N | 6(15.8%) | 0(0.0%) | 10(16.4%) | 9(16.7%) | 5(11.4%) | 2(28.6%) |
| D | 3(7.9%) | 0(0.0%) | 3(4.9%) | 4(7.4%) | 1(2.3%) | 1(14.3%) |
| SD | 4(10.5%) | 2(33.3%) | 3(4.9%) | 5(9.3%) | 4(9.1%) | 0(0.0%) |
|  | |  | | | |  | | | |
| Reading off-site exams helps my practice provide multi-specialty coverage | SA | 9(23.7%) | 2(33.3%) | 21(34.4%) | .070 | 16(29.6%) | 16(36.4%) | 0(0.0%) | .150 |
| A | 19(50.0%) | 1(16.7%) | 21(34.4%) | 19(35.2%) | 16(36.4%) | 6(85.7%) |
| N | 3(7.9%) | 1(16.7%) | 15(24.6%) | 11(20.4%) | 7(15.9%) | 1(14.3%) |
| D | 2(5.3%) | 0(0.0%) | 2(3.3%) | 4(7.4%) | 0(0.0%) | 0(0.0%) |
| SD | 5(13.2%) | 2(33.3%) | 2(3.3%) | 4(7.4%) | 5(11.4%) | 0(0.0%) |
|  | |  | | | |  | | | |
| Reading off-site exams helps my practice reduce turn-around times for preliminary interpretations | SA | 7(18.4%) | 2(33.3%) | 15(24.6%) | .115 | 9(16.7%) | 14(31.8%) | 1(14.3%) | .409 |
| A | 16(42.1%) | 2(33.3%) | 23(37.7%) | 20(37.0%) | 18(40.9%) | 3(42.9%) |
| N | 6(15.8%) | 0(0.0%) | 16(26.2%) | 14(25.9%) | 6(13.6%) | 2(28.6%) |
| D | 6(15.8%) | 0(0.0%) | 5(8.2%) | 8(14.8%) | 2(4.5%) | 1(14.3%) |
| SD | 3(7.9%) | 2(33.3%) | 2(3.3%) | 3(5.6%) | 4(9.1%) | 0(0.0%) |
|  | |  | | | |  | | | |
| Reading off-site exams helps my practice reduce turn-around times for final interpretations | SA | 9(23.7%) | 1(16.7%) | 15(24.6%) | .272 | 12(22.2%) | 13(29.5%) | 0(0.0%) | .534 |
| A | 15(39.5%) | 3(50.0%) | 27(44.3%) | 21(38.9%) | 19(43.2%) | 5(71.4%) |
| N | 6(15.8%) | 0(0.0%) | 11(18.0%) | 11(20.4%) | 5(11.4%) | 1(14.3%) |
| D | 5(13.2%) | 0(0.0%) | 6(9.8%) | 7(13.0%) | 3(6.8%) | 1(14.3%) |
| SD | 3(7.9%) | 2(33.3%) | 2(3.3%) | 3(5.6%) | 4(9.1%) | 0(0.0%) |
|  | |  | | | |  | | | |
| Reading off-site exams helps my practice provide appropriate coverage when understaffed | SA | 12(31.6%) | 3(50.0%) | 25(41.0%) | .097 | 18(33.3%) | 22(50.0%) | 0(0.0%) | .006 |
| A | 16(42.1%) | 1(16.7%) | 25(41.0%) | 20(37.0%) | 16(36.4%) | 6(85.7%) |
| N | 4(10.5%) | 0(0.0%) | 9(14.8%) | 11(20.4%) | 2(4.5%) | 0(0.0%) |
| D | 2(5.3%) | 0(0.0%) | 0(0.0%) | 1(1.9%) | 0(0.0%) | 1(14.3%) |
| SD | 4(10.5%) | 2(33.3%) | 2(3.3%) | 4(7.4%) | 4(9.1%) | 0(0.0%) |
| *SA: strongly agree; A: agree; N: neutral; D: disagree; SD: strongly disagree. | | | | | | | | | |
